# Supplementary material
Source: bioRxiv or medRxiv preprint supplement (https://medrxiv.org/highwire/filestream/95793/field_highwire_adjunct_files/0/2020.09.04.20188086-1.pdf)
Supplement: Supplementary file [file 2020.09.04.20188086-1.pdf]

---

## NOTICE OF EXPEDITED APPROVAL

To: Edward Kaminski  
Anesthesiology  
10838 Saint Marys Lane

From: James Paxton, M.D. or designee  
Chairperson, Medical Pediatric Institutional Review Board (MP2)



Date: January 19, 2016

RE: IRB #: 121715MP2E

Protocol Title: Quality and Safety in Pediatric Anesthesia: Comparing Pediatric Post-Anesthesia Endotracheal Extubation in PACU versus Operating Room, a Retrospective Chart Review

Funding Source:

Protocol #: 1512014495

Expiration Date: January 18, 2017

Risk Level / Category: Pediatric: 45 CFR 46.404 - Research not involving greater than minimal risk

---

The above-referenced protocol and items listed below (if applicable) were **APPROVED** following *Expedited Review* (Category (5)\*) by the Chairperson/designee for the Wayne State University Institutional Review Board (MP2) for the period of 01/19/2016 through 01/18/2017. This approval does not replace any departmental or other approvals that may be required.

- Revised Protocol Summary Form (revision received in the IRB Office 1/11/2016)
- Protocol (version 1 dated 11/6/2015 received in the IRB Office 12/2/2015)
- Revised HIPAA Summary Form (revision received in the IRB Office 1/11/2016)
- A waiver of HIPAA Authorization has been granted in accordance with the Privacy Rule and justification provided by the Principal Investigator in the HIPAA Summary Form. This waiver satisfies: 1) the use or disclosure of PHI involves no more than minimal risk to the privacy of individuals, 2) the research could not be practicably conducted without the waiver, 3) the research could not be practicably conducted without access and use of the PHI, 4) adequate steps taken to protect identifiers from improper use or disclosure and 5) adequate plan for destroying identifiers or links.
- A waiver of consent and waiver of written documentation of consent has been granted according to 45CFR46.116(d) and 45CFR46.117(c). This waiver satisfies: 1) risk is no more than minimal, 2) the waiver does not adversely affect the rights and welfare of research participants, 3) the research could not be practicably carried out without the waiver, and 4) providing participants additional pertinent information after participation is not appropriate for the research design.
- Data Collection Sheet

---

◦ Federal regulations require that all research be reviewed at least annually. You may receive a "Continuation Renewal Reminder" approximately two months prior to the expiration date; however, it is the Principal Investigator's responsibility to obtain review and continued approval *before* the expiration date. Data collected during a period of lapsed approval is unapproved research and can *never* be reported or published as research data. All changes or amendments to the above-referenced protocol require review and approval by the WSU IRB **BEFORE** implementation. Adverse Reactions/Unexpected Events (AR/UE) must be submitted on the appropriate form within the timeframe specified in the WSU IRB Policy (<http://irb.wayne.edu>).

### NOTE:

1. Upon notification of an impending regulatory site visit, hold notification, and/or external audit the WSU IRB office must be contacted immediately.
2. Forms should be downloaded from the WSU IRB website (<http://irb.wayne.edu>) at *each* use.

\*Based on the Expedited Review List, revised November 1998



---

## NOTICE OF EXPEDITED CONTINUATION APPROVAL

To: Edward Kaminski  
Anesthesiology  
10838 Saint Marys Lane

From: James Paxton, M.D. or designee   
Chairperson, Medical Pediatric Institutional Review Board (MP2)

Date: February 10, 2017

RE: IRB #: 121715MP2E

Protocol Title: Quality and Safety in Pediatric Anesthesia: Comparing Pediatric Post-Anesthesia Endotracheal Extubation in PACU versus Operating Room, a Retrospective Chart Review

Funding Source:

Protocol #: 1512014495

Expiration Date: February 09, 2020

Risk Level / Category: Pediatric: 45 CFR 46.404 - Research not involving greater than minimal risk

---

Continuation for the above-referenced protocol and items listed below (if applicable) were APPROVED following Expedited Review by the Chairperson/designee of the Wayne State University Institutional Review Board (MP2) for the period of **02/10/2017 through 02/09/2020**. This approval does not replace any departmental or other approvals that may be required.

- Closed to accrual and active intervention completed (date of accrual closure 12/22/2016).
- Please note: This continuation was reviewed under the IRB Administration Office Flexible Review and Oversight Policy, therefore the expiration date is February 9, 2020.
- This protocol lapsed between January 18, 2017 and February 10, 2017. This lapse in IRB approval is considered non-compliance with federal regulations, 45CFR46, and WSU's IRB policies. Another lapse in IRB approval of this study or any other studies in which you are PI will be considered continuing non-compliance and will be reported to the federal authorities per Wayne State University's Federalwide Assurance.

- 
- Federal regulations require that all research be reviewed at least annually. You may receive a "Continuation Renewal Reminder" approximately two months prior to the expiration date; however, it is the Principal Investigator's responsibility to obtain review and continued approval **before** the expiration date. Data collected during a period of lapsed approval is unapproved research and can **never** be reported or published as research data. All changes or amendments to the above-referenced protocol require review and approval by the IRB **BEFORE** implementation.
  - Adverse Reactions/Unexpected Events (AR/UE) must be submitted on the appropriate form within the timeframe specified in the IRB Policy (<http://irb.wayne.edu>).

### NOTE:

1. Upon notification of an impending regulatory site visit, hold notification, and/or external audit the IRB office must be contacted immediately.
2. Forms should be downloaded from the IRB website (<http://irb.wayne.edu>) at **each** use.

Notify the IRB of any changes to the funding status of the above-referenced protocol.
